# Supplementary material for: Object-mediated overwriting across saccades
Source: PubMed Central journal article supplement (PMC7862732; doi:10.1167/jov.21.2.3), 2021-02-04
Supplement: jovi-21-2-3_s001.pdf [file jovi-21-2-3_s001.pdf]

### Pre-saccadic Color Report

### Post-saccadic Color Report

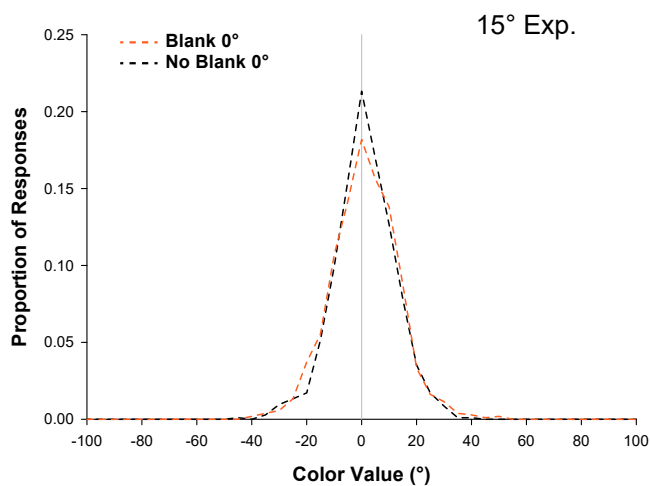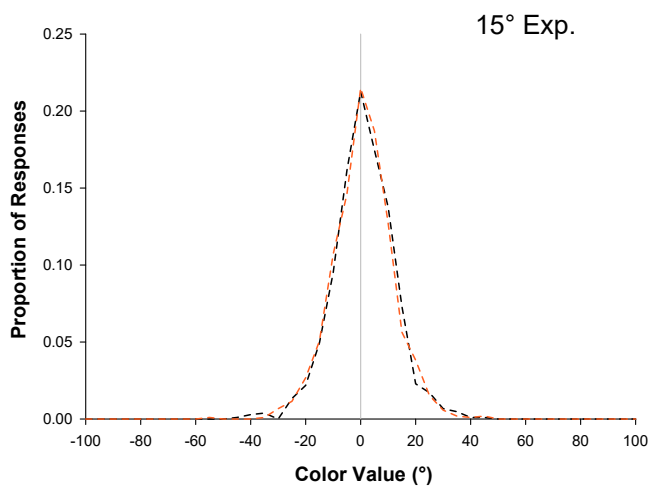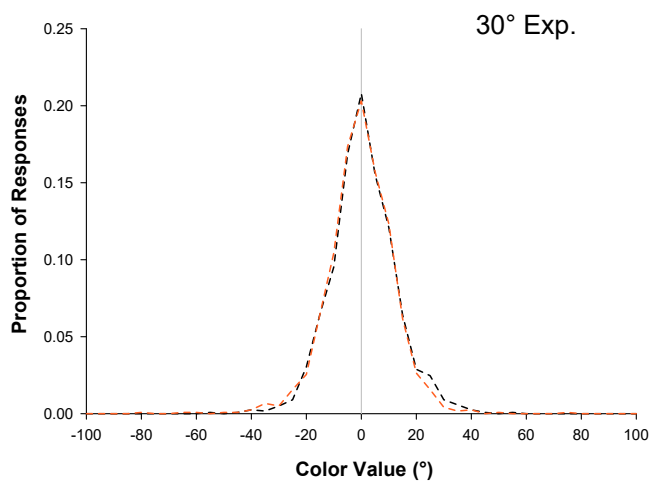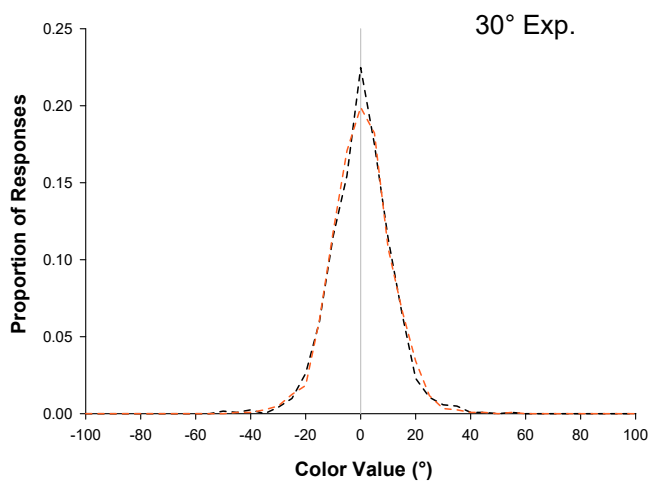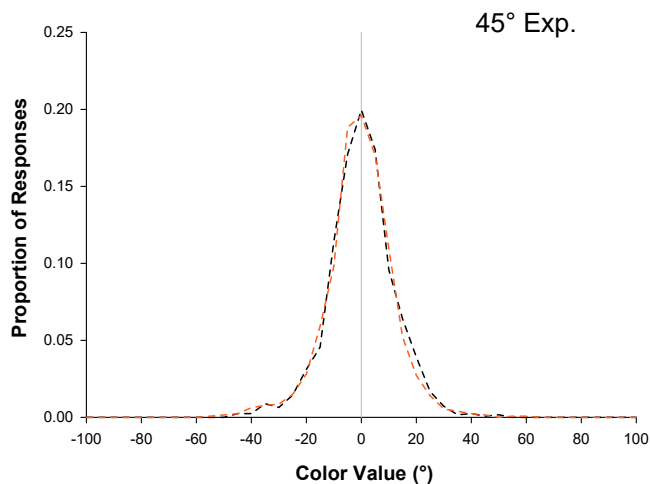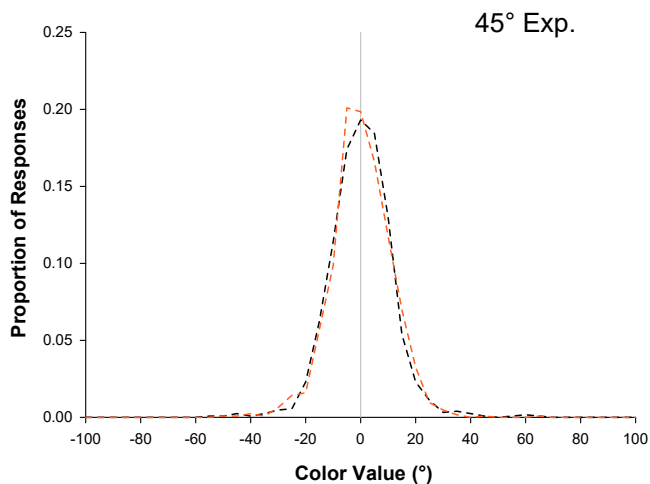

**Supplementary Figure 1.** No-change color response distributions for the Pre-report (left column) and Post-report (right column) trials as a function of color change magnitude and Blanking condition.
